# Supplementary material for: Paradoxical Sleep Deprivation Causes Cardiac Dysfunction and the Impairment Is Attenuated by Resistance Training
Source: PLoS One. 2016 Nov 23;11(11):e0167029. doi: 10.1371/journal.pone.0167029 (PMC5120843; doi:10.1371/journal.pone.0167029)
Supplement: S1 Dataset — (XLS) [file pone.0167029.s001.xls]

## Sheet: General Dataset
Animals	Group	Testosterone Total (ng/dL)	T3 (ng/dL)	T4 (ng/dL)	IGF-1 (pg/mL)	Corticosterone (ng/mL)	CRP (mg/dL)	Angiotensin II (pg/mL)	BW - Week 1 (g)	BW - Week 2 (g)	BW - Week 3 (g)	BW - Week 4 (g)	BW - Week 5 (g)	BW - Week 6 (g)	BW - Week 7 (g)	BW - Week 8 (g)	Weight Variation (g)	BW Before PSD96 (g)	BW 24h PSD96 (g)	BW 48h PSD96 (g)	BW 72h PSP96 (g)	BW After PSD96 (g)	PSD96 Weight Variation (g)	Weight Variation 24h - Baseline PSD (g)	Weight Variation 48h -24h PSD (g)	Weight Variation 72h -48h PSD (g)	Weight Variation 96h-72h PSD (g)	Maximum Load - Week 1 (g)	Maximum Load - Week 2 (g)	Maximum Load - Week 3 (g)	Maximum Load - Week 4 (g)	Maximum Load - Week 5 (g)	Maximum Load - Week 6 (g)	Maximum Load - Week 7 (g)	Maximum Load - Week 8 (g)	Tibia Length (mm)	Left Atrium Weight (g)	Left Atrium/Tibia Lenght (mg/mm)	Collagen Volume Fraction (%)	Myocyte Cross-Sectional Area (µm2)	Plantaris Cross-Sectional Area (µm2)	Area of Cardiac Chamber of the Left Ventricle	NFATc3/GAPDH (u.a)	GATA-4/GAPDH (u.a)	RyR/Total Protein (%C)	SERCA2a/GAPDH (%C)	p.PLN/PLN (%C)	NCX/GAPDH (%C)
Rat 1.1	C	339.3	38.56	7.2	217.87	43.5	0.18	7.80022	390	419	428	441	452	468	479	479	89	470	477	473	477	476	6	7	-4	4	-1	391	510	510	540	570	570	600	630	42	0.0301	0.716667	10.64	297.07	2903.11	6.53	0.56	0.16	78.125	95.1644	101.099	109.002
Rat 1.2	C	107.5	66.7	8.67	280.02	13.9	0.31	17.9181	378	392	395	414	414	418	430	430	52	374	376	378	378	377	3	2	2	0	-1	374	395	425	545	665	755	785	845	43	0.0297	0.690698	11.44	270.06	2709.36	10.39	1.23	1.49	4.20673	102.128	57.1429	100.164
Rat 1.3	C	177.7	54.57	7.66	293.72	7.6	0.32	15.2099	345	366	375	389	395	404	407	407	62	420	421	416	421	419	-1	1	6	5	-2	309	340	340	370	400	430	460	580	40	0.0186	0.465	7.39	274.33	2547.08	8.48	0.97	0.83	51.0817	13.9265	75.4579	63.8298
Rat 1.4	C	189.5	74.32	10.12	378.15	56.3	0.29	14.4304	372	360	362	382	389	397	394	394	71	411	412	418	416	415	4	1		-2	-1	332	450	450	450	480	510	510	570	41	0.0243	0.592683	5.38	299.56	2696.26	14.72	0.91	0.78	39.6635	81.2379	166.3	56.9558
Rat 1.5	C	256.6	65.17	9.12		31.5	0.2	9.96811	340	388	393	395	408	416	411	411	89	396	399	393	396	398	2	3		3	2	328	420	420	420	480	540	540	570	41	0.0266	0.64878		290.48	2633.47	5.83	0.72	0.82	326.923	215.861		148.282
Rat 1.6	C	217.87	50.09	5.32		8.7	0.31	12.2376	383	390	398	414	419	445	456	472	69																										1.01			91.6828		121.768
Rat 1.7	C	200.59	32.2	1.97		10.2	0.48		397	404	410	426	426	435	451	466	56
Rat 1.8	C	280.02	72.35	4.67		37.6	0.15		309	315	329	341	343	350	364	365	56
Rat 1.9	C	293.72	64.4	5.04		26.8	0.34		351	356	366	375	386	390	403	407	88
Rat 1.10	C	251.5	67.55	5.36		8	0.28		375	379	385	406	424	434	456	463
Rat 1.11	RT	468.9	80.61	7.63	577.48	6.9	0.25	15.6546	442	466	472	476	486	500	489	447	34	334	332	334	333	332	-2	-2	2	-1	-1	395	515	575	665	695	725	725	815	43	0.0365	0.492857	11.85	309.04	3117.31	6.54	0.8	0.75	121.875	174.081	164.103	44.1899
Rat 1.12	RT	299.7	82.59	9.6	608.71	15.2	0.21	12.2709	383	401	406	412	411	416	417	417	35	408	410	408	413	410	2	2	-2	5	-3	349	590	680	800	890	950	1100	1190	42	0.0207	0.62439	11.59	338.54	3252.74	7.74	0.98	0.79	60.5769	286.654	117.216	125.696
Rat 1.13	RT	306.6	45.92	8.14	373.15	42.6	0.36	15.1696	391	412	412	420	410	428	426	426	48	384	382	385	387	386	2	-2	3	2	-1	319	470	620	680	740	800	800	890	41	0.0256	0.570732	9.8	320.79	3244.72	9.38	0.85	1.16	110.337	38.2979	165.568	69.7218
Rat 1.14	RT	358.1	52.2	7.65	487.09	10.1	0.32	15.389	404	429	435	445	443	456	452	452	42	381	384	389	390	389	8	3	5	1	-1	365	575	665	775	895	925	985	1105	41	0.0234	0.497619	8.78	311.19	2895.12	10.31	0.88	1.06	50.4808	199.613	66.6667	82.4877
Rat 1.15	RT	409.1	64.61	7.78		84.9	0.37	14.0544	338	357	356	363	365	379	380	380	47	410	416	420	418	413	3	6	4	-2	-1	381	590	710	890	1010	1040	1070	1190	42	0.0209	0.817073	4.71	312.19	2635.97	8.5	1.07	1.48	23.0769	83.559	143.59	168.903
Rat 1.16	RT	338.2	56.02	7.46		15.9	0.15		442	466	472	476	486	500	489	489	42	390	397	400	399	398	8	7	3	-1		375	585	795	885	1035	1215	1245	1245	41	0.0335		7.51	327.05			1.02	1.04		73.1141	95.9707	88.3797
Rat 1.17	RT	577.48	45.46	9.36		5.4	0.24		313	321	327	331	340	352	355	355	32
Rat 1.18	RT	608.71	59.03	7.19		14.2	0.15		354	354	354	368	369	374	381	386	48
Rat 1.19	RT	373.15	77.1	6.08		54.6	0.35		405	402	410	413	426	432	443	457	14
Rat 1.20	RT	487.09	57.8	5.38		21.9	0.33		350	351	361	358	362	377	388	398
Rat 1.21	RT								384	373	376	372	384	390	395	398
Rat 1.22	PSD96	115.5	53.03	6.43	152.96	298.5	0.4	16.375	363	380	383	391	397	410	402	398	35	428	406	402	401	393	-35	-22	-4	-1	-8									42	0.0328	0.780952	15.12	381.46		5.34	1.14	1.33	40.3846	63.8298	13.9194	98.1997
Rat 1.23	PSD96	133.1	89.41	6.48	173.36	270.9	0.22	16.1789	435	387	390	414	422	423	431	415	59	431	397	394	387	380	-51	-34	-3	-7	-7									42	0.0346	0.82381	12.32	388.26		5.24	1.28	1.52	65.625	176.402	44.6886	173.813
Rat 1.24	PSD96	177.7	60.47	6.47	99.66	163.1	0.31	18.7114	379	454	467	472	481	491	489	477	64	437	409	402	389	383	-54	-28	-7	-13	-6									41	0.0218	0.812195	15.7	398.02		6.86	1.2	1.53	130.529	15.087	8.05861	57.9378
Rat 1.25	PSD96	145.8	75.13	5.32	169.17	211.4	0.32	26.7171	403	394	404	432	440	448	424	422	63	448	428	416	409	395	-53	-20	-12	-7	-14									41	0.0333	0.707143	13.51	369.59		5.17	1.07	0.84	100.962	147.389	37.3626	130.606
Rat 1.26	PSD96	206.33	79.3	6.57		380.9	0.32	15.781	384	413	411	429	436	447	452	443	68	441	412	404	403	395	-46	-29	-8	-1	-8									42	0.0297	0.797619	13.96	395.4		6.61			81.4904	100.967	27.1062	140.426
Rat 1.27	PSD96	152.96	59.85	4.08		65.1	0.39	17.4869	372	375	384	394	397	409	425	436	73																			42	0.0335		13.92	386.63						61.5087	57.1429	67.7578
Rat 1.28	PSD96	155.5	49.41	3.44		51.88	0.37	13.6061	300	306	315	327	335	340	357	363	69
Rat 1.29	PSD96	114.2	73.19	4.64		278.22	0.26	18.6193	352	355	360	374	384	394	408	420
Rat 1.30	PSD96	117.4	63.18	2.87		101.19	0.31	18.9163	364	369	373	378	395	403	427	437
Rat 1.31	PSD96		44.28	3.93		101.47			372	375	379	375	400	418	430	441
Rat 1.32	RT/PSD96	240.6	70.72	7.08	218.79	87.9	0.37	19.1636	390	399	403	410	427	422	418	412	22	383	362	358	359	355	-28	-21	-4	1	-4									42	0.0241	0.57381	12.43	355.3		4.3	0.84	1.2	94.4712	146.228	17.5824	149.264
Rat 1.33	RT/PSD96	207.8	76.35	4.94	412.7	170.2	0.24	24.4286	372	374	393	400	411	407	407	392	20	371	363	360	358	350	-21	-8	-3	-2	-8									41	0.0243	0.592683	13.77	370.78		7.01	1.35	1.12	120.433	114.894	43.2234	145.336
Rat 1.34	RT/PSD96	365.3	65.17	6.15	463.91	90.1	0.34	19.1313	388	383	396	414	420	430	429	411	23	386	368	360	360	361	-25	-18	-8	0	1									42	0.0302	0.719048	10.65	372.86		4.53	0.88	0.77	62.0192	164.797	43.2234	40.2619
Rat 1.35	RT/PSD96	140.7	71.99	5.99		152.4	0.29	14.6304	403	400	402	408	418	412	406	396	45	395	382	376	368	361	-34	-13	-6	-8	-7									41	0.0301	0.734146	11.15	367.22		2.6	1.24	0.95	7.21154	141.586	20.5128	93.2897
Rat 1.36	RT/PSD96	218.79	78.29	5.35		38.4	0.39	18.0615	322	326	340	345	362	362	365	480	34	378	361	357	346	336	-42	-17	-4	-11	-10									40	0.0315	0.7875	10.06	359.76		6.26			13.7019	44.1006		38.2979
Rat 1.37	RT/PSD96	412.7	82.54	4.81		81.4	0.22	14.6905	345	350	352	372	369	369	374	369	40	376	366	359	355	348	-28	-10	-7	-4	-7									41	0.0207	0.504878	13.21	373.91		7.5				344.681		40.2619
Rat 1.38	RT/PSD96	157.61	65.05	6.59		163.3	0.19	18.0556	417	427	440	441	456	473	480	385	73
Rat 1.39	RT/PSD96	463.91	57.82	3.96		94.8	0.39	23.4941	341	343	349	353	356	362	368	367	26
Rat 1.40	RT/PSD96	321.2	55.8	4.1		148.9	0.38	22.8063	376	387	392	402	417	427	435	446	70
Rat 1.41	RT/PSD96	218	69.68	4.57					353	358	372	381	387	405	422	433
